# Supplementary material
Source: HighWire-hosted journal article supplement (https://bmjopen.bmj.com/content/9/7/e027977)
Supplement: inline-supplementary-material-1 [file inline-supplementary-material-1.pdf]

**Supplementary Table 1. Search strategy, modified as needed for use in other databases**

|                                                                                                                                                                                                                                                                                                                                                                                                                                                                                                                                                      |
|------------------------------------------------------------------------------------------------------------------------------------------------------------------------------------------------------------------------------------------------------------------------------------------------------------------------------------------------------------------------------------------------------------------------------------------------------------------------------------------------------------------------------------------------------|
| Search PubMed                                                                                                                                                                                                                                                                                                                                                                                                                                                                                                                                        |
| #1 (violence and injury observator*) OR (injury surveillance system) OR (crime observator*)                                                                                                                                                                                                                                                                                                                                                                                                                                                          |
| #2 (“domestic abuse*” OR “physical abuse*” OR “partner abuse*” OR violent OR violence OR assault OR homicide OR gang OR gangs OR gang violence OR bully OR aggression OR aggressive OR robbery OR assault OR GBH OR contact crime OR interpersonal violence OR murder OR homicide OR aggravated assault OR robbery OR suicide OR transit death OR non intentional death OR kidnappings OR theft OR robberies OR rape OR sexual crimes OR assault OR physical violence OR aggression OR sexual violence OR violent crime OR violent crime conviction) |
| #3 (prevention OR preventing OR prevent OR reduction OR reduce OR decrease OR decreased OR decreasing OR decline OR declining OR control OR controlling OR impact OR effect OR effects OR affect OR affecting OR affects OR change OR changing OR changes OR intervene OR intervention)                                                                                                                                                                                                                                                              |
| #4 adult                                                                                                                                                                                                                                                                                                                                                                                                                                                                                                                                             |
| #5                                                                                                                                                                                                                                                                                                                                                                                                                                                                                                                                                   |
| #6                                                                                                                                                                                                                                                                                                                                                                                                                                                                                                                                                   |
| #1 AND #2                                                                                                                                                                                                                                                                                                                                                                                                                                                                                                                                            |
| #3 AND #4                                                                                                                                                                                                                                                                                                                                                                                                                                                                                                                                            |

MeSH, medical subject heading.

The strategy outlined here was specifically for searching the PubMed database, and was modified for use in other databases.
